# Supplementary material
Source: ML conference proceedings conference paper supplement (https://proceedings.neurips.cc/paper_files/paper/2020/hash/10eb6500bd1e4a3704818012a1593cc3-Abstract.html)
Supplement: Supplementary file [file 10eb6500bd1e4a3704818012a1593cc3-Supplemental.pdf]

## 8 Appendix

### 8.1 Sklar's Theorem

**Theorem 3** (Sklar, 1959). *Let  $F$  be a distribution function with margins  $F_1, \dots, F_d$ . Then there exists a  $d$ -dimensional copula  $C$  such that for all  $(x_1, \dots, x_d) \in \mathbb{R}^d$  it holds that  $F(x_1, \dots, x_d) = C(F(x_1), \dots, F(x_d))$ . Furthermore, if  $F_1, \dots, F_d$  are continuous, then  $C$  is unique. Conversely, if  $C$  is a  $d$ -dimensional copula and  $F_1, \dots, F_d$  are univariate distribution functions, then  $F(x_1, \dots, x_d) = C(F(x_1), \dots, F(x_d))$  is a  $d$ -dimensional distribution.*

### 8.2 Derivations for derivatives of inverses

If  $g$  is the inverse of  $f$ , that is,  $g_w(y) = f_w^{-1}(y)$  or  $g_w(f_w(t)) = t$  for some weights  $w$ . If we treat  $w$  as parameters as well, then we have scalar functions  $g(a, b)$  and  $f(c, d)$  such that the identity

$$g(f(t, w), w) = t$$

holds for all possible  $w$ .

**Part 1.** We want to find  $\left. \frac{\partial g(y, r)}{\partial y} \right|_{\substack{y=a \\ r=w}}$ . Since  $f$  and  $g$  are scalar functions of  $y$ , it is easy to see geometrically that

$$\left. \frac{\partial g(y, r)}{\partial y} \right|_{\substack{y=a \\ r=w}} = 1 / \left( \left. \frac{\partial f(x, r)}{\partial x} \right|_{\substack{x=g(a, w) \\ r=w}} \right)$$

**Part 2.** We want to find  $\left. \frac{\partial g(y, r)}{\partial r} \right|_{\substack{y=a \\ r=w}}$  for a given  $w$  and  $a$ , given access to an oracle  $f(x, r)$ ,  $g(y, r)$ ,  $\frac{\partial f(x, r)}{\partial r}$ ,  $\frac{\partial f(x, r)}{\partial x}$  and for any values of  $x, y, r$ . Here, evaluating  $g(y, w)$  requires a call to Newton's method and the 2 partial derivatives may be obtained from autograd. Taking *full* derivatives of the identity  $g(f(t, w), w) = t$  with respect to  $w$  yields

$$\begin{aligned} \frac{dg(f(t, w), w)}{dw} &= \frac{\partial g}{\partial f} \frac{\partial f}{\partial w} + \frac{\partial g}{\partial w} \\ &= \left( \left. \frac{\partial g(y, r)}{\partial y} \right|_{\substack{y=f(t, w) \\ r=w}} \right) \cdot \left( \left. \frac{\partial f(x, r)}{\partial r} \right|_{\substack{x=t \\ r=w}} \right) + \left. \frac{\partial g(y, r)}{\partial r} \right|_{\substack{y=f(t, w) \\ r=w}} \\ &= 0 \\ \left. \frac{\partial g(y, r)}{\partial r} \right|_{\substack{y=f(t, w) \\ r=w}} &= - \left( \left. \frac{\partial g(y, r)}{\partial y} \right|_{\substack{y=f(t, w) \\ r=w}} \right) \cdot \left( \left. \frac{\partial f(x, r)}{\partial r} \right|_{\substack{x=t \\ r=w}} \right) \end{aligned}$$

Note that this holds for all  $t$ . Performing a substitution gives

$$\begin{aligned} \left. \frac{\partial g(y, r)}{\partial r} \right|_{\substack{y=a \\ r=w}} &= - \left( \left. \frac{\partial g(y, r)}{\partial y} \right|_{\substack{y=a \\ r=w}} \right) \cdot \left( \left. \frac{\partial f(x, r)}{\partial r} \right|_{\substack{x=g(a, w) \\ r=w}} \right) \\ &= - \left( \left. \frac{\partial f(x, r)}{\partial r} \right|_{\substack{x=g(a, w) \\ r=w}} \right) / \left( \left. \frac{\partial f(x, r)}{\partial x} \right|_{\substack{x=g(a, w) \\ r=w}} \right), \end{aligned}$$

where the last line holds using  $[h^{-1}]'(x) = 1/[h'(h^{-1}(x))]$  for scalar  $h$  (Part 1).

### 8.3 Proof of Theorem 2

We first show that the output at each layer  $\{\varphi^{\text{nn}}\}(t)$  is a convex combination of negative exponentials, i.e.,

$$\{\varphi^{\text{nn}}\}_{\ell, i}(t) = \sum_{k=1}^{K_{\ell, i}} \alpha_k \exp(-\beta_{\ell, i, k} t) \quad \text{where} \quad \sum_{k=1}^{K_{\ell, i}} \alpha_{\ell, i, k} = 1,$$

where  $K_\ell = \prod_{q=1}^{\ell-1} H_q$  and denotes the number of components in the mixture of exponentials (with potential repetitions). The theorem is shown by induction on the layer index  $\ell$ . The base case when  $\ell = 0$  is obvious by setting  $K_{0,1} = 1, \alpha_{0,1} = 1, \beta_{0,1} = 0$ . Now suppose that the induction hypothesis is true for all  $\{\varphi^{\text{nn}}\}_{\ell-1,i}$ , we have,

$$\begin{aligned}
\{\varphi^{\text{nn}}\}_{\ell,i}(t) &= \exp(-B_{\ell,i} \cdot t) \sum_{j=1}^{H_{\ell-1}} A_{\ell,i,j} \{\varphi^{\text{nn}}\}_{\ell-1,j}(t) \\
&= \exp(-B_{\ell,i} \cdot t) \sum_{j=1}^{H_{\ell-1}} A_{\ell,i,j} \sum_{k=1}^{K_{\ell-1}} \alpha_{\ell-1,j,k} \exp(-\beta_{\ell-1,j,k} t) \quad (\text{induction hypothesis}) \\
&= \sum_{j=1}^{H_{\ell-1}} \sum_{k=1}^{K_{\ell-1}} \underbrace{A_{\ell,i,j} \alpha_{\ell-1,j,k}}_{\alpha_{\ell,i,\cdot}} \exp(-\underbrace{(\beta_{\ell-1,j,k} + B_{\ell,i})}_{\beta_{\ell,i,\cdot}} t) \\
&= \sum_{k=1}^{K_\ell} \alpha_{\ell,i,k} \exp(-\beta_{\ell,i,k} t). \tag{4}
\end{aligned}$$

In the third and fourth line, we can also see that  $\sum_{k=1}^{K_\ell} \alpha_{\ell,i,k}$  since from the induction hypothesis  $\sum_{k=1}^{K_{\ell-1}} \alpha_{\ell-1,j,k} = 1$  and the design of ACNet, which guarantees  $\sum_{j=1}^{H_{\ell-1}} A_{\ell,i,j} = 1$ . Theorem 2 follows from the fact that sum of completely monotone functions are also completely monotone. The range of  $\{\varphi^{\text{nn}}\}$  follows directly from it being a convex combination of negative exponentials.

#### 8.4 Representation of $M$ in ACNet as a Markov reward process

It is known that Archimedean copula with completely monotone generators are *extendible*, and have generators  $\varphi$  which are Laplace transforms of (almost surely) positive random variables  $M$ . The random variable  $M$  is known as the *mixing variable* in a manner analogous to the De Finetti's theorem (observe that Archimedean copula are exchangeable), such that a sample from the copula  $C$  is given by  $(\varphi(E_1/M), \dots, \varphi(E_d/M))$ , where the  $E_i$  are i.i.d. samples from an exponential distribution with scale parameter 1. Hence,  $M$  is known as the mixing(latent) variable, since each  $U_i$  is independent of  $U_j, i \neq j$  conditioned on  $M$ . For more information about extendible copula, refer to Chapters 1-3 of Matthias, Scherer, and Mai Jan-frederik.

From the derivations in (4), it can be seen that for all  $\ell \in [L], i \in [H_\ell], k \in [K_{\ell,i}]$ , we have

$$\beta_{\ell,i,k} = \sum_{q=1}^{\ell} B_{\ell,z_q^k}, \quad \alpha_{\ell,i} = \prod_{\ell'=1}^{\ell} A_{\ell',z_{\ell'}^k, z_{\ell'-1}^k}$$

where  $z_q \in [H_q]$  such that the sequence of nodes  $((0, z_0^k = 1), (1, z_1^k), \dots, (\ell-1, z_{\ell-1}^k), (\ell, z_\ell^k))$ , each given of the form (layer, index), represents a forward path along the directed acyclic graph prescribed by the layers of the network, starting from the input node to the node  $(\ell, i)$ . For the  $i$ -th output in the  $\ell$ -th layer, each constituent decay weight  $\beta_{\ell,i,k}$  is the sum of ‘ $B$ -terms’ taken along some path starting from the input node and ending at the  $(\ell, i)$ -th node. Similarly, the  $\alpha_{\ell,i,k}$  terms are the *product* of weights of convex combinations, given by the ‘ $A$ -terms’ taken along that same path. Each term in the summand of (4) has a one-to-one mapping with such a path.

Consequently, each constituent exponential function in the output node is represented by a path  $((0, z_0), (1, z_1), \dots, (L, z_L), (L+1, 1))$ . Let  $\mathcal{P}$  be the set of all such paths, where the  $k$ -th path is given by  $p_k = ((0, z_0^k) = 1, (1, z_1^k), \dots, (L, z_L^k), (L+1, z_{L+1}^k = 1))$ .

$$\begin{aligned}
\{\varphi^{\text{nn}}\}_{L+1,1}(t) &= \sum_{k=1}^{K_{L+1}} \alpha_{L+1,1,k} \exp(-\beta_{\ell,i,k} t) \\
&= \sum_{p_k \in \mathcal{P}} \left( \prod_{\ell=1}^{L+1} A_{\ell, z_\ell^k, z_{\ell-1}^k} \right) \left( \exp(-\left( \sum_{\ell=1}^L B_{\ell, z_\ell^k} \right) t) \right) \\
&= \mathcal{L} \left\{ \sum_{p_k \in \mathcal{P}} \left( \prod_{\ell=1}^{L+1} A_{\ell, z_\ell^k, z_{\ell-1}^k} \right) \delta \left( t - \sum_{\ell=1}^L B_{\ell, z_\ell^k} \right) \right\} \tag{5}
\end{aligned}$$

Using the fact that  $\sum_{j=1}^{H_{\ell-1}} A_{\ell,i,j} = 1$  (by the design of ACNet), we can see that each  $A_\ell$  is a transition matrix from one layer to the one which *precedes* it. Since  $\ell \in [L], \sum_{k=1}^{K_{\ell,i}} \alpha_{\ell,i,k} = 1$ , the expression in (5) is the Laplace transform of a discrete random variable  $M$  taking values at  $\sum_{\ell=1}^L B_{\ell, z_\ell^k}$  with probability  $\left( \prod_{\ell=1}^{L+1} A_{\ell, z_\ell^k, z_{\ell-1}^k} \right)$ ,

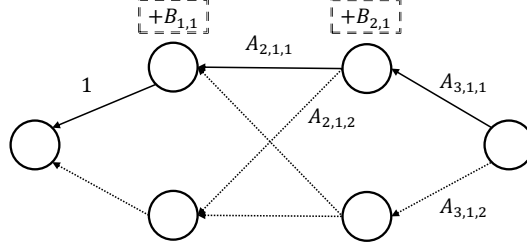

Figure 10: Sampling  $M$  starting from the output node. Labels on edges denote probabilities of transition. Numbers in boxes correspond to rewards accumulated at each hidden node. Straight lines show a potential sample path in sampling, with total ward  $B_{1,1} + B_{2,1}$ .

---

**Algorithm 1:** Sampling from ACNet

---

**Result:**  $d$  dimensional sample from ACNet

$M \leftarrow 0$ , state  $\leftarrow$  output node;

**while** state is not in first layer **do**

    Sample next state propotionate to  $A$ ;

    state  $\leftarrow$  next state;

    Accumulate  $M$  according to state based on  $B$ ;

**end**

Draw  $d$  i.i.d. samples  $E_i \sim \text{Exp}(1)$  ;

**return**  $(\{\varphi^{\text{nn}}\}(E_1/M), \dots, \{\varphi^{\text{nn}}\}(E_d/M))$

---

for each possible  $p_k \in \mathcal{P}$ . This is precisely the random variable coresponding to the Markov reward process in the ‘reversed network’ with rewards  $\{B_\ell\}$  and transition matrixes  $\{A_\ell\}$ —most notably, the transitions given by  $A_\ell$  are independent of the previous transitions taken and only depend on current state. A graphical representation of this when  $L = 2$  and  $H_\ell = 2$  is given in Figure 10. This Markovian property is precisely why ACNet is able to represent a generator comprising an exponential (in terms of parameters) of negative exponential components. Since we can sample from  $M$ , we are also able to sample from the copula efficiently using the algorithm of [25]. The psuedocode for doing so is given in Algorithm 1.

### 8.5 Representational limits of ACNet

Copulas are sometimes used to model upper and lower tail-dependencies. When  $d = 2$ , they are quantified respectively by,

$$UTD_C = \lim_{u \rightarrow 1^-} \frac{C(u, u) - 2u + 1}{1 - u} = \lim_{u \rightarrow 1^-} \mathbb{P}(U_1 > u | U_2 > u) \quad (\text{Upper tail dependency})$$

$$LTD_C = \lim_{u \rightarrow 0^+} \frac{C(u, u)}{u} = \lim_{u \rightarrow 0^+} \mathbb{P}(U_1 \leq u | U_2 \leq u) \quad (\text{Lower tail dependency})$$

assuming those limits exist. These quantities describe the limiting dependencies in the tails of the joint distribution. Many common Archimedean copula are have asymmetric tail dependencies, i.e.,  $UTD_C \neq LTD_C$ . Both  $UTD_C$  and  $LTD_C$  of an Archimedean copula are closely linked to the mixing variable  $M$ . In particular, if  $\mathbb{E}(M) < \infty$  then  $UTD_C = 0$ . Similarly, if  $M$  is bounded away from zero, i.e., there exists  $\epsilon$  such that  $\mathbb{P}(M \in [0, \epsilon]) = 0$ , then  $LTD_C = 0$ . Since  $M$  is discrete with a finite support, both these conditions are satisfied and  $UTD_C$  and  $LTD_C$  are equal to 0.

### 8.6 Probabilistic quantities derivable from $C$ (or $F$ )

Table 1 gives a list of some of the common probabilistic quantities which can be derived from  $C$  (or  $F$ ).

| Name               | Expression                                                                          | Formula in terms of $C$ or $F$                                                                                                            |
|--------------------|-------------------------------------------------------------------------------------|-------------------------------------------------------------------------------------------------------------------------------------------|
| Distribution       | $C(u_1, \dots, u_d)$                                                                | $C(u_1, \dots, u_d)$                                                                                                                      |
| Likelihood         | $p(u_1, \dots, u_d)$                                                                | $\frac{\partial^d C(u_1, \dots, u_d)}{\partial u_1 \dots \partial u_d}$                                                                   |
| Cond. Distribution | $\mathbb{P}(X_{\bar{K}} \leq x_{\bar{K}}   X_K = x_K)$                              | $\frac{\partial F(x_K, x_{\bar{K}})}{\partial x_1 \dots \partial x_k} \Big/ \frac{\partial F(x_K, 1)}{\partial x_1, \dots, \partial x_k}$ |
| Cond. Likelihood   | $p(X_{\bar{K}} = x_{\bar{K}}   X_K = x_K)$                                          | $\frac{\partial F(x_K, x_{\bar{K}})}{\partial x_1 \dots \partial x_d} \Big/ \frac{\partial F(x_K, 1)}{\partial x_1, \dots, \partial x_k}$ |
| Probability        | $\mathbb{P}(U_1 \in [u_1, \bar{u}_1] \wedge \dots \wedge U_d \in [u_d, \bar{u}_d])$ | See $d$ -increasing property, (1)                                                                                                         |

Table 1: Probabilistic quantities written in terms of derivatives of  $C$  or  $F$ .

## 8.7 Datasets

The POWER and GAS datasets are obtained from the UCI machine learning repository (<https://archive.ics.uci.edu/ml/index.php>). The Boston housing dataset is commonly found and may be downloaded through scikit-learn (<https://scikit-learn.org/stable/datasets/index.html>) or Kaggle (<https://www.kaggle.com/c/boston-housing>). The INTC-MSFT dataset is standard in copula libraries for R (<https://rdr.io/cran/copula/man/rdj.html>). The GOOG-FB dataset was obtained by the authors from Yahoo Finance. We will provide instructions on how to obtain the final 2 datasets alongside our source code.
